# Supplementary material for: Bacterial Cholangitis in Autosomal Dominant Polycystic Kidney and Liver Disease
Source: PubMed Central journal article supplement — Mayo Clin Proc Innov Qual Outcomes. 2019 May 27;3(2):149–59. doi: 10.1016/j.mayocpiqo.2019.03.004 (PMC6543502; doi:10.1016/j.mayocpiqo.2019.03.004), 2019-05-27
Supplement: mmc5.pdf [file mmc5.pdf]

**Supplemental Table 1. Indications for sphincterotomy in patients who had sphincterotomy performed at ERCP prior to first cholangitis episode (n=7).<sup>a</sup>**

| Patient | ADPKD/ADPLD | Cholangitis | Sphincterotomy Indication                                                                                                                                                 |
|---------|-------------|-------------|---------------------------------------------------------------------------------------------------------------------------------------------------------------------------|
| 1       | ADPKD       | Definite    | Presented with acute cholecystitis with dilated CBD of unclear etiology; no CBD stones/sludge evident at ERCP but sphincterotomy performed.                               |
| 2       | ADPKD       | Definite    | Removal of asymptomatic left intrahepatic duct gallstone (incidentally noted on CT) and left intrahepatic duct stent placement.                                           |
| 3       | ADPKD       | Definite    | Retained CBD stone evident on intraoperative cholangiogram during laparoscopic cholecystectomy.                                                                           |
| 4       | ADPKD       | Definite    | Presented with acute febrile illness and found to have mildly dilated extrahepatic bile duct on CT. No gallstones/sludge evident on ERCP but sphincterotomy performed.    |
| 5       | ADPKD       | Definite    | Removal of symptomatic CBD stones (abdominal pain without evidence of cholangitis).                                                                                       |
| 6       | ADPKD       | Definite    | Presented with acute cholecystitis with dilated CBD of unclear etiology; no CBD stones/sludge evident at ERCP but sphincterotomy performed.                               |
| 7       | ADPLD       | Definite    | Bile leak after laparoscopic fenestration of liver cysts for symptomatic polycystic liver disease. Sphincterotomy performed to facilitate stenting of the bile duct leak. |

<sup>a</sup>ADPKD = autosomal dominant polycystic kidney disease; ADPLD = autosomal dominant polycystic liver disease; CBD = common bile duct; ERCP = endoscopic retrograde cholangiopancreatography.
